# Supplementary material for: Possible Epigenetic Origin of a Recurrent Gynandromorph Pattern in Megachile Wild Bees
Source: MDPI journal article supplement (doi:10.3390/insects12050437), 2021-05-12
Supplement: s1 [file s1]

**Table S1.** List of *Megachile* transverse gynandromorphs discussed in the paper. References as in the main text.

| Species                                                | N. Sp. | Locality                                                      | Reference |
|--------------------------------------------------------|--------|---------------------------------------------------------------|-----------|
| <i>M. (Chelostomoides) angularum</i> Cockerell, 1902   | 2      | Piney Valley, California, USA<br>Twain Harte, California, USA | [15]      |
| <i>M. (Ptilosaurus) bertonii</i> Schrottky, 1908       | 2      | Chapada, Brazil                                               | [14]      |
| <i>M. (Pseudocentron) curvipes</i> Smith, 1853         | 1      | S. Geronimo, Guatemala                                        | [15]      |
| <i>M. (Eutricharaea) deceptor</i> Pérez, 1890          | 1      | Tarhankut Peninsula, Ukraine                                  | [9]       |
| <i>M. (Eutricharaea) detersa</i> Cockerell, 1911       | 15     | Not reported                                                  | [22]      |
| <i>M. (Eutricharaea) gathela</i> Cameron, 1908         | 1      | Kangra, India                                                 | [28]      |
| <i>M. (Xanthosaurus) gemula</i> Cresson, 1878          | 1      | Bryson City, North Carolina, USA                              | [14]      |
| <i>M. (Leptorachis) intergradus</i> Mitchell, 1929     | 2      | Pedra Branca, Brazil<br>Chapada, Brazil                       | [14]      |
| <i>M. (Eutricharaea) cf. leachella</i> Curtis, 1828    | 1      | Andritsaina, Greece                                           | [68]      |
| <i>M. (Xanthosaurus) maritima</i> (Kirby, 1802)        | 1      | Berskow, Germany                                              | [26]      |
| <i>M. (Austromegachile) montezuma</i> Cresson, 1878    | 1      | São Carlos, Brazil                                            | [27]      |
| <i>M. (Litomegachile) onobrychidis</i> Cockerell, 1914 | 1      | Lompoc, California, USA                                       | [14]      |
| <i>M. (Chelostomoides) otomita</i> Cresson, 1878       | 1      | Pujilic, Chiapas, Mexico                                      | [8]       |
| <i>M. (Argyropyle) parallela</i> Smith, 1853           | 1      | Lane Co, Kansas, USA                                          | [14]      |
| <i>M. (Argyropyle) parallela</i> Smith, 1853           | 1      | Twain Harte, California, USA                                  | [15]      |
| <i>M. (Xanthosaurus) perihirta</i> Cockerell, 1898     | 1      | Mt. Hood, Oregon, USA                                         | [14]      |
| <i>M. (Eutricharaea) picicornis</i> Morawitz, 1853     | 6      | Karadag, Crimea, Ukraine<br>Opuk, Crimea, Ukraine             | [9]       |
| <i>M. (Eutricharaea) pilidens</i> Alfken, 1924         | 6      | Berici Hills, Italy                                           | Here      |
| <i>M. (Eutricharaea) pilidens</i> Alfken, 1924         | 1      | Platania Volos, Greece                                        | [23]      |
| <i>M. (Pseudocentron) rubricata</i> Smith 1853         | 5      | Minas Gerais, Santana do Riacho, Brazil                       | [29]      |
| <i>M. (Chrysosaurus) tapytensis</i> Mitchell, 1929     | 1      | Tapyta, Paraguay                                              | [14]      |
| <i>M. (Neochelynia) uniformis</i> Mitchell, 1929       | 1      | Chapada, Brazil                                               | [14]      |
| <i>M. (Xanthosaurus) vidua</i> Smith, 1853             | 2      | Bilby, Alberta, Canada<br>Lethbridge, Alberta, Canada         | [14]      |
| <i>M. (Xanthosaurus) vidua</i> Smith, 1853             | 1      | Nordeg, Alberta, Canada                                       | [15]      |
| <i>Megachile sp.</i>                                   | 1      | Chapada, Brazil                                               | [14]      |
